# Supplementary material
Source: PubMed Central journal article supplement (PMC3021782)
Supplement: NIHMS263074-supplement-supp_figs_1-3.pdf [file NIHMS263074-supplement-supp_figs_1-3.pdf]

## SUPPLEMENTAL FIGURE LEGENDS

**Supplemental Figure A1** –Schematic of the rat MEK-1 promoter and sequence. Numbers indicate the positions from the transcriptional start site. There are one potential CREB binding site, two GATA-1 sites, three Sp1 sites, and many other regulatory elements within the fragment of MEK-1 promoter.

**Supplemental Figure A2** –Effect of polyamine depletion on MEK-1 protein stability. **A**: representative immunoblots of MEK-1 in cells exposed to DFMO alone or DFMO plus putrescine. After cells were cultured in control medium and medium containing DFMO alone or DFMO plus Put for 6 days, cycloheximide (CHX) at the concentration of 25 µg/ml was added to cultures and whole cell lysates were harvested at the indicated times. Levels of MEK-1 protein were assayed using Western blot analysis, and equal loading of proteins was monitored using actin. **B**: quantitative densitometric Western blot analysis of cells described in **A**. Value are means ± SE of data from three separate experiments, and relative levels of MEK-1 protein were corrected for protein loading as measured using densitometry of actin.

**Supplemental Figure 3** – Effect of increasing cellular polyamines by ectopic ODC expression on MEK-1 protein stability. **A**: representative immunoblots of MEK-1: **a**, cells transfected with the Null (control); and **b** stable ODC-IEC-C1 cells; and **c**, stable ODC-IEC-C2 cells. After cycloheximide (CHX) was added to cultures, whole cell lysates were harvested at the indicated times. **B**: quantitative densitometric Western blot analysis of cells described in **A**. Value are means ± SE of data from three separate experiments, and relative levels of MEK-1 protein were corrected for protein loading as measured using densitometry of actin.

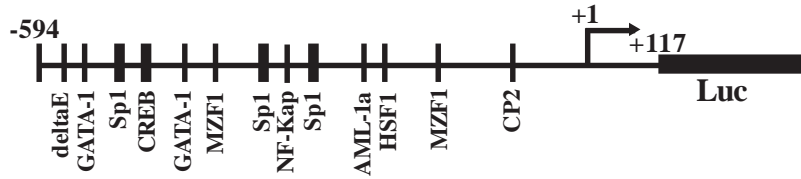

### MEK-1 promoter sequence

```

CGATAGGTAC CGAACCTGCG TGCAGAACCT CCTACAGCAT TCACCTGGCC -545
ACCGATTGGT CAGCAGAGGG CGCCTGGAAA GCCTCCTTTT AACCCCGCCC -495
CAGGCCAGCG CGCCGCGCCT CCCGTGACGT ATTTCCGCGT CATCTGCCGC -445
TGAGGCTAGT CCCCATTTGC TGTCGGCAAA GCTACAGGGC GGAGTCAGGC -395
GGGCGTGAGG GAAGCTCTGC AGCTCCCCGT GGGGGCGGGG CTGCCTATT -345
TCCCGCCTCC TCCCTCGCCC TCCAGTCCCT CTCTGGGACG TCTGTACGCC -295
GCGTCTCTGA GTGCGGTGGC CGCGGTGGCC GCACTTTCTC CGGGTGGTGC -245
TGTAGCCGAG CTGTGGGGAG TGCGCAGAAG GGCCGCCCGA GCCCAAGGAA -195
AGCGTGCGCT GAGGCGAGAG TCCCGGGCCG GCGAGCGCGC GCAGCTAGTT -145
CTCCGCGTGG GTTGGGCGGA GGGTCCCAGG AGCGTGGCGC TGAGAGAGAG -95
AGAGGGAGAG AGAGAGAGAG AGCGGCCCCG ACTCTGGGCA GAGCCGAGGG -45
AGGAAGCGAG AAGCGGCCGC GCGCTCCCTG CTGAGTTGCA GGCTGTTTCC +5
                                     ↳ +1
CGGCTGCAAG ATGCCCAAGA AGAAGCCGAC GCCCATCCAG CTGAACCCGG +55
CTGAACCCGG CCCCCGATGG CTCCGCGGTT AACGGGACCA GCTCGGCCGA +95
GTGAGTACCG GGAGTGGCCG GG

```

undersored sequence: coding region of MEK-1

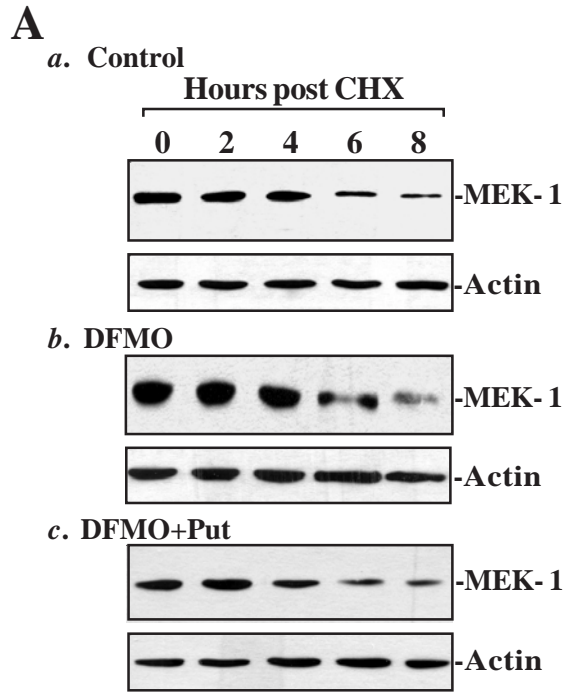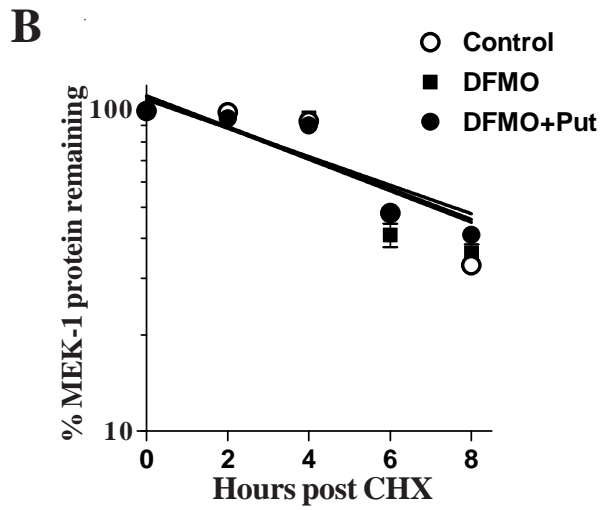

Supplemental Figure-2

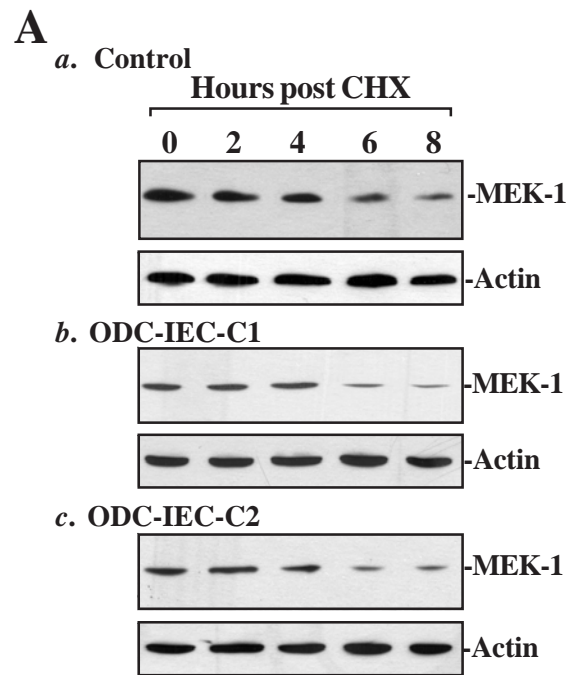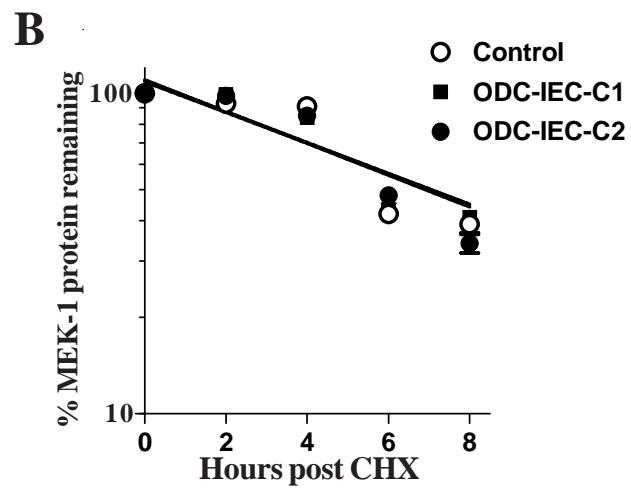

Supplemental Figure-3
